# Supplementary material for: Physical Performance and Skeletal Muscle Transcriptional Adaptations Are Not Impacted by Exercise Training Frequency in Mice with Lower Extremity Peripheral Artery Disease
Source: MDPI journal article supplement (doi:10.3390/metabo13040562), 2023-04-16
Supplement: s1 [file s1]

## Article

# Physical Performance and Skeletal Muscle Transcriptional Adaptations Are Not Impacted by Exercise Training Frequency in Mice with Lower Extremity Peripheral Artery Disease

Jessica Lavier, Karima Bouzourène, Grégoire P Millet, Lucia Mazzolai and Maxime Pellegrin

**Table S1.** Mouse primer sequences used for quantitative real-time PCR.

| Gene   | Forward sequence                  | Reverse sequence                   |
|--------|-----------------------------------|------------------------------------|
| 36B4   | 5'-ATGGGTACAAGCGCGTCCTG-3'        | 5'-GCCTTGACCTTTTCAGTAAG-3'         |
| GYS1   | 5'-GAGAACGCAGTGCTTTTCGA-3'        | 5'-TCATCCCCTGTCACCTTCG-3'          |
| GLUT-1 | 5'-GTGTATCCTGTTGCCTTC-3'          | 5'-GCTTCTTCAGCACACTCTT-3'          |
| GLUT-4 | 5'-CTCTCAGGCATCAATGCTGTTTCTA-3'   | 5'-CGAGACCAACGTGAAGACCGTATT-3'     |
| HK2    | 5'-GCTAGGAGCTACCACACACCCT-3'      | 5'-ACTCGCCATGTTCTGTCCCATCC-3'      |
| PFK    | 5'-GGAGTGCGTGCAGGTGACCAAA-3'      | 5'-ATCACGGCCACTGTGTGCAACC-3'       |
| PDK4   | 5'-TACTCCACTGCTCCAACACCTG-3'      | 5'-AGCCATAACCAAAACCAGCCAAAG-3'     |
| LDHA   | 5'-TGCCTACGAGGTGATCAAGCT-3'       | 5'-GCACCCGCTAAGGTTCTTC-3'          |
| LDHB   | 5'-AGTCTCCCGTGCATCCTCAA-3'        | 5'-AGGGTGTCCGCACTCTTCCT-3'         |
| MCT1   | 5'-TTGTCTGTCTGGTTGCGGCTT-GATCG-3' | 5'-GCCCAAGACCTCCAATAACAC-CAATGC-3' |
| MCT4   | 5'-GCCACCTCAACGCCTGCTA-3'         | 5'-TGTCGGGTACACCCATATCCTTA-3'      |
| CD36   | 5'-ATGGGCTGTGATCGGAAGT-3'         | 5'-GTCTTCCCAATAAGCATGTCTCC-3'      |
| FABP3  | 5'-ACCTGGAAGCTAGTGGACAG-3'        | 5'-TGATGGTAGTAGGCTTGTCAT-3'        |
| CPT1β  | 5'-TGGACCGTGAAGAGATCAAGC-3'       | 5'-CTCTTTGCCTGGGATGCGT-3'          |
| HSL    | 5'-ACTGAGATTGAGGTGCTGTC-3'        | 5'-TGAGATGGTAACTGTGAGCC-3'         |
| UCP2   | 5'-TTCCCTGTTGATGTGGTCAA-3'        | 5'-CAGTGACCTGCGCTGTGGTA-3'         |
| LCAD   | 5'-CATATTCCCCCAGGACATTG-3'        | 5'-CACAATTGCCTCTATGTGCATT-3'       |
| PPAR-γ | 5'-ACCACTCGCATTCTTTGAC-3'         | 5'-TGGGTCAGCTCTTGTGAATG-3'         |
| PGC-1α | 5'-ACTATGAATCAAGCCACTACAGAC-3'    | 5'-TTCATCCCTCTTGAGCCTTTTCG-3'      |
| PGC-1β | 5'-GAGGAGTCCCTTCCTTCATC-3'        | 5'-TCCTCGAAGGTTAAGGCTGA-3'         |
| NRF1   | 5'-GCACCTTTGGAGAATGTGGT-3'        | 5'-CTGAGCCTGGGTCAATTTTGT-3'        |
| TFAM   | 5'-CCAAAAAGACCTCGTTCAGC-3'        | 5'-CTTCAGCCATCTGCTCTTCC-3'         |
| CS     | 5'-GGACAATTTTCCAACCAATCTGC-3'     | 5'-TCGGTTCATTCCCCTCTGCATA-3'       |
| MyH7   | 5'-CCTGCTGTTTCCTTACTTG-3'         | 5'-CTGTACTCCTCTGCTGAG-3'           |
| MyH2   | 5'-CTGACTCGTCTGCTTTA-3'           | 5'-CTCACAGACCCTTACTGG-3'           |
| MyH1   | 5'-AAAGCTTCAAGTTTGGACC-3'         | 5'-GAGAGAGCCTGCCTTTAG-3'           |
| MyH4   | 5'-GTCCTTCCTCAAACCTTA-3'          | 5'-CTCTTGTTTACCAGATGAAG-3'         |
| VEGFA  | 5'-TGACCCACGACAGAAGG-3'           | 5'-GCACACAGGACGGCTTGA-3'           |
| HIF-1α | 5'-TCAAGTCAGCAACGTGGAAG-3'        | 5'-TATCGAGGCTGTGTCGACTG-3'         |
| IL-1β  | 5'-TGAAGTTGACGGACCCCAAAA-3'       | 5'-TGATGTGCTGCTGTGAGATT-3'         |
| CD11c  | 5'-ACACAGTGTGCTCCAGTATGA-3'       | 5'-GCCCAGGGATATGTTACACAGC-3'       |
| IL-10  | 5'-GCACTACCAAAGCCACAAGGC-3'       | 5'-GTCAGTAAGAGCAGGCAGCATAG-3'      |
| IL-1ra | 5'-ACAGTAGAAGGAGACAGAAG-3'        | 5'-CCTGGTAGAGCAGAAGAC-3'           |
